# Supplementary material
Source: HighWire-hosted journal article supplement (https://bmjpaedsopen.bmj.com/content/3/1/e000390)
Supplement: inline-supplementary-material-1 [file inline-supplementary-material-1.pdf]

## Questionnaire for the medical practitioner who requisitioned the EBV-tests:

Was suspicion of mononucleosis the reason for taking the EBV-tests?  YES  NO

If yes...

Did the patient have fever?  YES  NO  DON'T KNOW  
CE \_\_\_\_\_ °C

Did the patient have swollen lymph nodes on the neck?  YES  NO  DON'T KNOW

Did the patient have tonsillitis?  YES  NO  DON'T KNOW

Did the patient have pharyngitis?  YES  NO  DON'T KNOW

|                             |                                      |
|-----------------------------|--------------------------------------|
| Date for the first contact: | Date for estimated start of disease: |
|                             |                                      |

CRP(if this was measured):

Are you the patient's general practitioner?  YES  NO

If yes...

How long have you been the patient's GP? \_\_\_\_\_ years

How long have you worked as a general practitioner/emergency doctor? \_\_\_\_\_ years

We know that approx. 20% of all patients with mononucleosis are fatigued ½ year after acute disease, do you think this particular patient will be among those 20%?

YES  NO  DON'T KNOW

Other information:
